## A neuronal mechanism underlying decision-making deficits during hyperdopaminergic states

Jeroen P.H. Verharen <sup>1</sup>  
Johannes W. de Jong <sup>1,2</sup>  
Theresia J.M. Roelofs <sup>1</sup>  
Christiaan F.M. Huffels <sup>1</sup>  
Ruud van Zessen <sup>1</sup>  
Mieneke C.M. Luijendijk <sup>1</sup>  
Ralph Hamelink <sup>3,4</sup>  
Ingo Willuhn <sup>3,4</sup>  
Hanneke E.M. den Ouden <sup>5</sup>  
Geoffrey van der Plasse <sup>1</sup>  
Roger A.H. Adan <sup>1,7</sup>  
Louk J.M.J. Vanderschuren <sup>6,7</sup>

<sup>1</sup> Brain Center Rudolf Magnus, Department of Translational Neuroscience, University Medical Center Utrecht, Utrecht, The Netherlands.

<sup>2</sup> Department of Molecular and Cell Biology and Helen Wills Neuroscience Institute, University of California Berkeley, Berkeley, California, USA.

<sup>3</sup> Netherlands Institute for Neuroscience, Institute of the Royal Netherlands Academy of Arts and Sciences, Amsterdam, The Netherlands.

<sup>4</sup> Department of Psychiatry, Academic Medical Center, University of Amsterdam, Amsterdam, The Netherlands.

<sup>5</sup> Donders Institute for Brain, Cognition and Behavior, Radboud University, Nijmegen, The Netherlands.

<sup>6</sup> Department of Animals in Science and Society, Division of Behavioural Neuroscience, Faculty of Veterinary Medicine, Utrecht University, Utrecht, The Netherlands.

<sup>7</sup> These authors contributed equally.

Correspondence should be addressed to R.A.H.A. ([r.a.h.adan@umcutrecht.nl](mailto:r.a.h.adan@umcutrecht.nl)) or L.J.M.J.V. ([l.j.m.j.vanderschuren@uu.nl](mailto:l.j.m.j.vanderschuren@uu.nl)).

1 **Hyperdopaminergic states in mental disorders are associated with disruptive deficits in**  
2 **decision-making. However, the precise contribution of topographically distinct**  
3 **mesencephalic dopamine pathways to decision-making processes remains elusive. Here we**  
4 **show, using a multidisciplinary approach, how hyperactivity of ascending projections from**  
5 **the ventral tegmental area (VTA) contributes to faulty decision-making in rats. Activation of**  
6 **the VTA-nucleus accumbens pathway leads to insensitivity to loss and punishment due to**  
7 **impaired processing of negative reward prediction errors. In contrast, activation of the VTA-**  
8 **prefrontal cortex pathway promotes risky decision-making without affecting the ability to**  
9 **choose the economically most beneficial option. Together, these findings show how**  
10 **malfunction of ascending VTA projections affects value-based decision-making, providing a**  
11 **mechanistic understanding of the reckless behaviors seen in substance abuse, mania, and**  
12 **after dopamine replacement therapy in Parkinson's disease.**  
13

14 Impaired decision-making can have profound negative consequences, both in the short and in the  
15 long term. As such, it is observed in a variety of mental disorders, such as mania<sup>1,2</sup>, substance  
16 addiction<sup>3-6</sup>, and as a side effect of dopamine (DA) replacement therapy in Parkinson's disease<sup>7,8</sup>.  
17 Importantly, these disorders are associated with aberrations in DAergic neurotransmission<sup>9,10</sup>, and  
18 DA has been implicated in decision-making processes<sup>11-13</sup>. However, ascending DAergic  
19 projections from the ventral mesencephalon are anatomically and functionally heterogeneous<sup>14-16</sup>  
20 and the contribution of these distinct DA pathways to decision-making processes remains elusive.

21 The mesocorticolimbic system, comprising DA cells within the ventral tegmental area (VTA)  
22 that mainly project to the nucleus accumbens (NAc; mesoaccumbens pathway) and medial  
23 prefrontal cortex (mPFC; mesocortical pathway), has an important role in value-based learning and  
24 decision-making<sup>14-16</sup>. When an experienced reward is better than expected, the firing of VTA DA  
25 neurons increases, thereby signaling a discrepancy between anticipated and experienced reward  
26 to downstream regions. Conversely, when a reward does not fulfill expectations, DA neuronal  
27 activity decreases. This pattern of DA cell activity is the basis of reward prediction error (RPE)  
28 theory<sup>17-20</sup>, which describes an essential mechanism through which organisms learn to flexibly alter  
29 their behavior when the costs and benefits associated with different courses of action shift.  
30 Although the relevance of RPEs in value-based learning is widely acknowledged, little is known  
31 about how different VTA target regions process these DA-mediated error signals, and how this  
32 ultimately leads to adaptations in behavior.

33 Here, we used projection-specific chemogenetics combined with behavioral tasks,  
34 pharmacological interventions, computational modelling, *in vivo* microdialysis and *in vivo* neuronal  
35 population recordings to investigate how different ascending VTA projections contribute to value-  
36 based decision-making processes in the rat. Specifically, we investigated the mechanism  
37 underlying the aberrant decision-making style that is associated with increased DA neuron activity.  
38 We hypothesized that hyperactivation of VTA neurons interferes with reward prediction error  
39 processing, leading to impaired adaptation to reward value dynamics. We predicted an important  
40 contribution of the mesoaccumbens pathway in incorporating experienced reward, loss and  
41 punishment into future decisions, considering the importance of the NAc in reinforcement learning  
42 and motivated behaviors<sup>21-23</sup>, and a modulatory role for the mesocortical pathway in value-based  
43 choice behavior, given its involvement in executive functions, such as decision-making and  
44 behavioral flexibility<sup>24,25</sup>. Furthermore, we tested an explicit prediction based on a  
45 neurocomputational model of the DA system, in which impaired negative RPE processing is  
46 involved in learning deficits during DA replacement therapy<sup>7,26</sup>.

## 47 **RESULTS**

### 48 **Dopaminomimetic drugs impair serial reversal learning**

51 To test the role of DA in flexible value-based decision-making, rats were tested in a serial reversal  
52 learning task following systemic treatment with the DA neurotransmission enhancers cocaine and  
53 D-amphetamine. A reversal learning session (Fig. 1a) comprised 150 trials, and started with the  
54 illumination of two nose poke holes in an operant conditioning chamber. One of these was  
55 randomly assigned as active, and responding in this hole resulted in sucrose delivery under a  
56 fixed-ratio (FR) 1 schedule of reinforcement. When animals had made five consecutive correct  
57 responses, the contingencies reversed so that the previously inactive hole now became active, and  
58 vice versa.

59 Injection of either drug did not affect the number of trials needed to reach the criterion of a  
60 series of five consecutive correct responses (Fig. 1b, left panel). However, the number of reversals  
61 achieved in the entire session was significantly reduced in the drug-treated animals (Fig. 1b, right  
62 panel, and Fig. S1a). Thus, cocaine and D-amphetamine impaired task performance, but this effect  
63 did not appear until the moment of first reversal. We reasoned that this pre- and post-reversal  
64 segregation in drug effects on task performance is related to the structure of the task (Fig. 1a).  
65 That is, after every reversal, the value of the outcome of responding in the previously active hole  
66 declines, and conversely, the value associated with responding in the previously inactive hole  
67 increases. Accordingly, this task entails a combination of devaluation and revaluation mechanisms  
68 following reversals.

69 To understand the nature of the drug-induced deficit in reversal learning performance, we  
70 analyzed the animals' behavior in more detail. Perseverative responding, i.e. the average number  
71 of responses in the previously active hole directly after a reversal, was not altered after cocaine or  
72 D-amphetamine treatment (Fig. 1c). Lose-stay behavior, i.e. the percentage of (unrewarded) trials  
73 in the inactive nose poke hole followed by a response in the (still) inactive hole, was also not  
74 affected (Fig. 1d, left panel). However, win-stay behavior, i.e. the percentage of responses in the  
75 active nose poke hole after which the animal responded in that same active hole, was significantly  
76 decreased after treatment with cocaine or D-amphetamine (Fig. 1d, right panel). This drug-induced  
77 reduction in win-stay behavior indicates that even though the animals received a reward after  
78 responding in the active nose poke hole, they next sampled the inactive hole more often than after  
79 saline treatment. Importantly, win-stay behavior was only reduced after reversal, indicating that  
80 behavioral impairments were not the result of a general decline in task performance or sensitivity to  
81 reward.

82 Overall, the effects in the reversal learning task indicate that increased DA signaling after  
83 cocaine or D-amphetamine treatment did not impair the animals' ability to find the active nose poke  
84 hole at task initiation, hence to assign positive value to an action. Yet, when the values of (the  
85 outcome of) two similar actions (that is, responding in a nose poke hole) changed relative to each  
86 other, drug-treated animals were impaired in adjusting behavior, perhaps as a result of a valuation  
87 deficit. This suggests that treatment with these drugs disrupted the process of integrating recent  
88 wins or losses (i.e., a revaluation or a devaluation impairment, respectively) in decisions.

89 To gain insight into the mechanisms underlying impaired reversal learning, we modelled the  
90 behavior of each subject by fitting the data to a computational reinforcement learning model (Fig.  
91 1e,f and Table S1). We used an extended version of the Rescorla-Wagner model<sup>27,28</sup>, using two  
92 different learning rates,  $\alpha_{\text{win}}$  and  $\alpha_{\text{loss}}$ , describing the animal's ability to learn from wins and losses,  
93 respectively<sup>29</sup>. Such a model-based approach investigates task performance based on an  
94 extended history of trial outcomes, and not merely the most recent outcome, such as win- and  
95 lose-stay measures do, providing a more in-depth analysis of the learning capacity of the animals.

96 When comparing the Rescorla-Wagner model coefficients of the animals after saline with  
97 those after cocaine and D-amphetamine treatment, we observed a strong decrease in parameter  
98  $\alpha_{\text{loss}}$  without affecting  $\alpha_{\text{win}}$  or choice stochasticity factor  $\beta$  (Fig. 1g,h, Fig. S1b,c and Table S2). This  
99 indicates that cocaine and D-amphetamine interfere with learning from negative, but not positive,  
100 RPEs.

## 101 **Chemogenetic activation of mesoaccumbens pathway impairs reversal learning**

102 In view of the role of DA in RPE signaling, we hypothesized that cocaine and D-amphetamine  
103 interfered with learning from losses by overactivation of ascending midbrain DA projections,  
104 thereby disrupting negative RPEs. This same mechanism has been hypothesized to be involved in  
105 the DA dysregulation syndrome in medicated Parkinson's disease patients<sup>7,30</sup>. Such an  
106 overactivation may lead to an inability to devalue stimuli and/or their associated outcomes,  
107 resulting in choice behavior that is not optimally value-based. Specifically, we were interested in  
108 the contribution of projections from the VTA to the NAc and the mPFC to impairments in reversal  
109 learning.

110 In order to activate neuronal subpopulations of the VTA in a projection-specific manner, we  
111 combined a canine adeno-associated virus retrogradely delivering Cre-recombinase (CAV2-Cre)  
112 and a Cre-dependent viral vector encoding hM3Dq(Gq)-DREADD fused to mCherry-fluorescent  
113 protein<sup>31</sup> (Fig. 2a and Fig. S2). This two-viral approach resulted in high levels of DA specificity  
114 (80% of the transfected neurons in the mesoaccumbens group and 72% of the transfected neurons  
115 in the mesocortical group were positive for tyrosine hydroxylase, Fig. 2b). To investigate whether  
116 the effects of cocaine and D-amphetamine on reversal learning were driven by activation of the  
117 mesoaccumbens or mesocortical pathway, animals were injected with clozapine-N-oxide (CNO)  
118 immediately before testing in the reversal learning task.

119 Chemogenetic activation of the mesoaccumbens pathway resulted in the same pattern of  
120 impairments in reversal learning as cocaine and D-amphetamine treatment, i.e. a reduction in the  
121 numbers of reversals achieved, without affecting trials to first reversal criterion (Fig. 2c). This  
122 pattern was confirmed by plotting the cumulative reversals as a function of completed trials (Fig. 2d  
123 and Fig. S3a). Similar to cocaine and D-amphetamine, the performance impairment during  
124 mesoaccumbens activation was associated with a post-reversal (but not pre-reversal) decrease in  
125 win-stay behavior (Fig. 2e), whereas perseverative responding and lose-stay behavior were not  
126 altered (Fig. 2f and Fig. S3b). Remarkably, during mesoaccumbens activation, both win- and lose-  
127 stay behavior were around 50% post-reversal, indicative of random choice behavior. Indeed, the  
128 Rescorla-Wagner model fitted with a significantly lower likelihood after mesoaccumbens activation  
129 (Fig. S3c), indicating that the animals' performance declined such that the model was less able to  
130 describe the data compared to baseline conditions. In contrast to mesoaccumbens activation,  
131 mesocortical activation or CNO injection in a sham-operated control group had no effect on  
132 reversal learning.

133 The finding that hyperactivity in the mesoaccumbens pathway evoked similar effects on  
134 reversal learning as cocaine and D-amphetamine did, suggests that these drugs exert their  
135 influence on flexible value-based decision-making through DA neurotransmission within the NAc.  
136 To directly test this, we performed *in vivo* microdialysis in the NAc of animals that expressed Gq-  
137 DREADD in the mesoaccumbens pathway (Fig. 2g). Administration of CNO increased baseline  
138 levels of DA in the NAc, as well as its metabolites 3,4-dihydroxyphenylacetic acid (DOPAC) and  
139 homovanillic acid (HVA) (Fig. 2h and Fig. S4). Next, we infused the DA receptor antagonist  $\alpha$ -  
140 flupenthixol into the NAc of DREADD-treated animals prior to chemogenetic activation of the  
141 mesoaccumbens pathway in a reversal learning test (Fig. 2i). This dose of  $\alpha$ -flupenthixol had no  
142 effect on reversal learning after systemic saline injection, but it restored the effect of  
143 chemogenetic activation of the mesoaccumbens pathway to a level statistically indistinguishable  
144 from saline treatment (Fig. 2j). This finding supports the assumption that the effects of  
145 mesoaccumbens hyperactivity are mediated through NAc DA receptor stimulation.

## 148 **Dopamine neuron activity during reversal learning**

149 Considering the function of RPEs in value updating<sup>20</sup>, we tested whether midbrain DA neurons  
150 tracked the presence of wins and losses in the form of RPEs during reversal learning. To this aim,  
151



152 we measured *in vivo* neuronal population activity from DA neurons in the VTA using fiber  
153 photometry<sup>32</sup> in TH::Cre rats (Fig. 3a and Supplementary Movie 1).

154 Around the time of responding, we observed a clear two-component RPE signal<sup>20</sup> (Fig. 3b,c  
155 and Fig. S5), i.e. a ramping of DA activity towards the moment of response, followed by an  
156 additional value component. That is, win trials were associated with a prolonged DA peak, whereas  
157 loss trials were characterized by a rapid decline in DA population activity after the response was  
158 made. No such signals were observed in animals injected with an activity-independent control  
159 fluorophore (Fig. S5).

160 Since mesoaccumbens hyperactivity only affected task performance after reversal, we  
161 compared DA activity pre- and post-reversal (Fig. 3c, right panels). In loss trials, we observed  
162 significantly stronger negative RPEs after the first reversal compared to before reversal. In  
163 contrast, DA peaks during the win trials were similar before and after the first reversal. This  
164 supports our notion that the impairment in reversal learning during mesoaccumbens hyperactivity  
165 was due to selective interference with learning from negative RPE-guided feedback.

166

### 167 **Mesoaccumbal activation interferes with adapting to devaluations**

168 To examine whether the effects of mesoaccumbens hyperactivity on learning from negative  
169 feedback generalizes to conditions beyond reversal learning, we trained rats on a probabilistic  
170 discounting task (modified from refs. 33 and 34). In this task, rats could choose between  
171 responding on a 'safe' lever, which always produces one sucrose pellet, or on another, 'risky' lever,  
172 which produces a larger reward (i.e., three sucrose pellets) with a given probability. Within a  
173 session, the chance of receiving the large reward after a response on the risky lever decreases  
174 across four trial blocks — in the first block, animals always received the large reward when  
175 pressing the risky lever, whereas the odds of winning were reduced to 1 in 12 in the fourth block  
176 (Fig. 4a and Fig. S6a). An important difference with reversal learning is that in this task, a response  
177 shift is not the best option after a loss *per se* — lose-stay behavior at the risky lever may yield the  
178 same amount of sucrose as a shift to the safe lever, depending on the odds in the trials block.  
179 Therefore, an increase in lose-stay or decrease in win-stay behavior does not necessarily reflect  
180 poor choice behavior.

181 After training, the animals showed stable discounting performance, preferring the risky lever  
182 in the first block, and shifting their choice towards the safe lever when the yield of the risky lever  
183 diminished (Fig. 4b, left panel). Mesoaccumbens activation (Fig. 4b, middle panel) decreased the  
184 choice of the risky lever in the first block and increased choice for the risky lever in the last block,  
185 resulting in a significantly reduced slope of the discounting curve (Fig. 4b, middle panel, inset), and  
186 a lower percentage of optimal choices (Fig. 4c). Importantly, the inability to discount the value of  
187 the risky lever in the latter blocks of the task is indicative of an inability to adapt to a declining  
188 outcome of responding on the risky lever (Fig. S6b). The reduced choice for the risky lever in the  
189 first block may also be due to a devaluation deficit, as the receipt of only one sucrose pellet after  
190 responding on the safe lever (compared to the three pellet yield of responding on the risky lever)  
191 may be perceived as a 'loss', since the relative value of responding on the safe lever is lower in  
192 this block<sup>35</sup>. In contrast, mesocortical activation only increased risk-seeking in the second block, in  
193 which the yield of the safe (1 pellet) and risky (1 in 3 chance of 3 pellets) levers were equal (Fig.  
194 4b, right panel), so that the amount of optimal choices remained unaffected (Fig. 4c). Further  
195 analysis of task strategy showed that lose-stay behavior at the risky lever was increased during  
196 activation of the mesoaccumbens and mesocortical pathways, whereas win-stay and safe-stay  
197 behavior were unaffected (Fig. 4d and Fig. S6c). Thus, activation of both ascending VTA  
198 projections made animals less prone to alter choice behavior after losses, which significantly  
199 impaired task performance during mesoaccumbens activation. The increase in lose-stay behavior  
200 during mesocortical activation is the result of the preference for the risky lever in the second trial  
201 block, but this did not result in poor choice behavior (Fig. 4c).

202 To test whether the effects in this task were specific to devaluation mechanisms, we trained  
203 the animals expressing DREADD in mesoaccumbens neurons on the same task with increasing,  
204 instead of decreasing odds of reward at the risky lever (Fig. 4e). In this condition, mesoaccumbens  
205 activation did not significantly change risky choice in any of the blocks (Fig. 4f), although a modest  
206 but significant decrease was observed in performance (i.e. a lower fraction of optimal choices; Fig.  
207 4g) which was caused by a higher preference for the risky lever in the first few trials (Fig. S6d).  
208 This could be the result of a reduced ability of the animals to devalue the outcome of responding  
209 on the risky lever in the initial trials of the first block. However, since this version of the task  
210 primarily relies on revaluation, rather than devaluation mechanisms, especially in later blocks (Fig.  
211 S6b), a mesoaccumbens stimulation-induced devaluation deficit caused no further changes in  
212 behavior. Indeed, win-stay and lose-stay behavior were unaffected by mesoaccumbens activation  
213 (Fig. 4g).

214 In sum, the effects of chemogenetic activation on the probabilistic discounting task support  
215 our hypothesis that mesoaccumbens activation results in an inability of animals to adapt behavior  
216 to lower-than-expected outcomes, which under physiological circumstances is mediated by  
217 negative RPE signals in DA cells. In contrast, mesoaccumbens hyperactivity did not markedly  
218 interfere with adaptations to higher-than-expected outcomes. Furthermore, mesocortical activation  
219 increased risky choice behavior, but only when this was without negative consequences for the net  
220 gain in the task.

### 221 **Dopamine pathway activation does not change static reward value**

222 Changes in static reward value may influence behavior in tasks investigating dynamic changes in  
223 reward value, such as the reversal learning task. For example, food rewards may be less or more  
224 appreciated due to changes in feelings of hunger, satiety or pleasure. Alternatively, operant  
225 responding may become habitual rather than goal-directed when manipulating the striatum,  
226 although this is thought to be mediated by its dorsal parts rather than the NAc<sup>22,36</sup>.

227 To assess whether alterations in static reward value or in the associative structure of  
228 operant responding contributed to the behavioral changes evoked by DA pathway stimulation, rats  
229 were subjected to operant sessions in which they could lever press for sucrose under an FR-10  
230 schedule of reinforcement. Activation of the mesoaccumbens and mesocortical pathways did not  
231 alter the total number of lever presses (Fig. 5a), suggesting that absolute reward value was  
232 unchanged. We also tested animals in operant sessions, whereby in half of the sessions the  
233 animals were pre-fed with the to-be obtained reward. This type of devaluation tests whether  
234 animals retain the capacity to adjust operant behavior to changes in (the representation of) reward  
235 value. Pre-feeding robustly diminished lever pressing for sucrose, both in a non-reinforced  
236 extinction session, as well as under an FR5 schedule of reinforcement. Importantly, this effect of  
237 chronic devaluation was not affected by mesoaccumbens or mesocortical activation (Fig. 5b),  
238 indicating that responding remained goal-directed<sup>36</sup>.

239 Consistent with previous findings<sup>37,38</sup>, activation of the mesoaccumbens pathway increased  
240 operant responding under a progressive ratio schedule of reinforcement<sup>39</sup> (Fig. 5c), which is often  
241 interpreted as reflecting an increased motivation to obtain food<sup>37-39</sup>. However, in light of the present  
242 findings, we interpret this finding to reflect that that mesoaccumbens activity renders animals less  
243 able to devalue the relative outcome of pressing the active lever when the response requirement  
244 increases over the session, hence leading to increased response levels. Such an action  
245 devaluation likely involves negative RPE signals from DA neurons.

### 246 **Mesoaccumbens hyperactivity evokes punishment insensitivity**

247 To test whether the devaluation deficit as a result of mesoaccumbens hyperactivity also resulted in  
248 an inability to incorporate explicitly negative consequences into a decision, we subjected animals  
249 to a novel punishment task, in which reward taking was paired with an increasing chance of an  
250 inescapable footshock (Fig. 6a). As expected, the introduction of this 0.3 mA footshock punishment  
251  
252

253 diminished responding for sucrose, an effect that persisted after injection of CNO in the  
254 mesocortical and sham control groups (Fig. 6b). In contrast, activation of the mesoaccumbens  
255 pathway completely abolished this punishment-induced reduction in responding, as the animals  
256 took as many rewards as under non-punishment conditions. This finding suggests that during  
257 mesoaccumbens hyperactivity, reward value is not properly discounted — in other words, animals  
258 are not able to take the increasingly negative consequences of an action into account. Consistent  
259 with a role for DA neurotransmission in processing these punishment signals, we observed, using  
260 *in vivo* calcium imaging, that footshock evoked a reduction in the activity of VTA DA neurons (Fig.  
261 6c).

262 To control for effects on nociception in our punishment task, we subjected the animals to a  
263 tail withdrawal test, and found this not to be affected by mesoaccumbens activation (Fig. 6d).  
264 Moreover, anxiety, as tested in the elevated plus maze (Fig. S7a,b), was unaffected by  
265 mesoaccumbens stimulation. Consistent with literature, we found that mesoaccumbens stimulation  
266 increased locomotion (Fig. S8a), just like cocaine and D-amphetamine do<sup>40,41</sup>. We think, however,  
267 that the changes in value-based decision-making observed in the punishment task, as well as in  
268 the other tasks, cannot readily be attributed to increased locomotion. First, reaction times in the  
269 punishment task were longer after mesoaccumbens activation (Fig. S8b). Second, responding in  
270 the inactive hole in the punishment task was not changed (Fig. S8c). Third, the effects of  
271 mesoaccumbens activation in the reversal learning task were restricted to win-stay behavior after  
272 the first reversal. Last, mesoaccumbens activation did not affect the time for the animals to  
273 complete the reversal learning session (Fig. S3d).

274  
275

### 276 **RPE processing during mesoaccumbens hyperactivity**

277 There are three possible explanations for the impaired negative RPE processing during  
278 mesoaccumbens hyperactivity: (1) hyperactivity of VTA DA neurons abolishes the trough in  
279 neuronal activity caused by negative reward prediction, (2) elevated DA levels lead to a baseline  
280 shift in RPE signalling, after which a decrease in DA release during negative reward prediction  
281 does not reach the lower threshold necessary to provide a learning signal in downstream regions,  
282 or (3) a combination of both.

283 To address the first explanation, we unilaterally injected animals with a mixture of the  
284 calcium fluorophore GCaMP6s and Gq-DREADD and tested animals for reversal learning (Fig. 7a  
285 and Fig. S9). This allowed us to measure RPE signals from VTA neurons within one animal during  
286 baseline conditions and during hyperactivation of these same neurons. CNO administration did not  
287 impair the ability of VTA DA neurons to signal RPEs during reversal learning (i.e. deviations from  
288 baseline during reward prediction), inconsistent with the first possible explanation. By extension,  
289 this also excluded the third explanation. However, the second explanation is consistent with our  
290 findings that chemogenetic stimulation of the mesoaccumbens pathway increases the extracellular  
291 concentration of dopamine and its main metabolites in the NAc (Fig. 2h). Together, these data  
292 support a scenario in which the inability to adjust behavior after loss or punishment during  
293 hyperactivation of the mesoaccumbens pathway is not due to an inability of VTA neurons to  
294 decrease their firing rate during negative reward prediction, but rather by impaired processing of  
295 this learning signal within the NAc as a result of increased baseline DA levels (Fig. 7b). This  
296 observation fits well with our earlier finding that the infusion of a DA antagonist into the NAc can  
297 prevent the effects of DREADD activation on reversal learning (Fig. 2j), a manipulation that  
298 restores the degree of NAc DA receptor activation.

299  
300  
301

## 302 DISCUSSION

303

304 Here, we show that hyperactivity of the mesoaccumbens pathway reduces the ability of animals to  
305 use loss and punishment signals to change behavior by interfering with negative RPE processing.  
306 Using *in vivo* neuronal population recordings, we show that the VTA signals reward presentation as  
307 well as reward omission during VTA neuron hyperactivity, meaning that the behavioral impairments  
308 are not caused by blunted DA neuron activity during negative reward prediction, but rather by  
309 impaired processing in the NAc as a result of elevated baseline levels of DA. Therefore, we  
310 propose a model (Fig. 7b) in which hyperactive VTA neurons signal positive and negative RPEs to  
311 the NAc, but because baseline DA tone is increased, the signaling threshold in the NAc that allows  
312 for the incorporation of negative RPEs into adaptive behavior cannot be reached during reward  
313 omission or punishment.

314 The majority of neurons transfected with the DREADD virus had a DAergic phenotype,  
315 chemogenetic mesoaccumbens activation replicated the effects of cocaine and D-amphetamine on  
316 reversal learning, and this effect of chemogenetic mesoaccumbens activation was prevented by  
317 intra-NAc infusion of the DA receptor antagonist  $\alpha$ -flupenthixol. Together, this supports the notion  
318 that the behavioral changes observed in the present study are the result of chemogenetic  
319 stimulation of VTA DA cells. However, a role for non-DA neurons cannot be excluded with the  
320 currently used techniques. Importantly, alongside the dense DA innervation, the VTA sends  
321 GABAergic, glutamatergic, as well as mixed DA/GABA or DA/glutamate projections to the NAc and  
322 mPFC<sup>16,42,43</sup>. The role that these projections play in behavior is only beginning to be investigated,  
323 but on the basis of what is presently known, we consider it unlikely that the non-DAergic  
324 innervation of the NAc and mPFC is involved in the behavioral changes observed here. For  
325 example, optogenetic stimulation of VTA GABA neurons has been shown to suppress reward  
326 consumption, something we did not observe in our experiments<sup>44</sup>. In addition, by inhibiting NAc  
327 cholinergic interneurons, stimulation of VTA GABA projections to the NAc has been shown to  
328 enhance stimulus-outcome learning<sup>45</sup>. However, increased stimulus salience does not readily  
329 explain the deficits in reversal learning, probabilistic discounting and punished responding for  
330 sucrose that we found in the present study. Last, stimulation of VTA-NAc glutamate neurons has  
331 been shown to produce aversive effects<sup>46</sup>, which in our experiments most likely would have  
332 increased, rather than impaired the ability to use negative feedback to alter behavior. Therefore,  
333 we think it is justified to state that the deficits in reversal learning, probabilistic discounting and  
334 punished reward taking evoked by chemogenetic mesoaccumbens stimulation is the result of  
335 increased DA signaling in the NAc. Reversal learning impairments have previously been reported  
336 after systemic or intra-NAc treatment with a DA D<sub>2</sub> receptor agonist in rats and humans<sup>47-49</sup>,  
337 whereas probabilistic discounting seems to be dependent on DA D<sub>1</sub> rather than D<sub>2</sub> receptor  
338 stimulation in the NAc<sup>50</sup>. Together, this suggests that the behavioral effects of mesoaccumbens  
339 hyperactivity observed here rely on stimulation of both DA receptor subtypes, depending on the  
340 task structure. Interestingly, the punishment insensitivity we observed after mesoaccumbens  
341 stimulation appears inconsistent with previous studies showing that treatment with amphetamine  
342 and the DA D<sub>2</sub> receptor agonist bromocriptine make animals more sensitive to probabilistic  
343 punishment in a risky decision-making task, in which animals can choose between a small and  
344 safe reward, and a large reward with a chance of punishment<sup>51,52</sup>. In this latter task, however,  
345 presentation of the punishment coincides with the presentation of the large reward, and it is  
346 unknown how DA neurons respond to such an ambivalent combination of events. Importantly, risky  
347 choice behavior was found to correlate positively with DA D<sub>1</sub> receptor expression in the NAc  
348 shell<sup>52</sup>, suggesting that the influence of NAc DA on behavior in this task may not be unidirectional.

349 In contrast to the mesoaccumbens projection, hyperactivity of the mesocortical pathway did  
350 not markedly affect value-based decision-making. It did increase the preference for large, risky  
351 rewards over small, but safe rewards in the probabilistic discounting task. However, when one of



352 the two options yielded more sucrose reward, animals remained capable of choosing the most  
353 beneficial option, perhaps as a result of the differential roles that prefrontal D1 and D2 receptors  
354 play in this task<sup>53</sup>. That these animals maintained the capacity to make proper value-based  
355 decisions was also apparent in the reversal learning and punishment tasks. Thus, the patterns of  
356 effects of mesocortical stimulation is qualitatively different from the mesoaccumbens-activated  
357 phenotype, even though there is modest overlap, such as the increased lose-stay behavior in the  
358 probabilistic discounting task. Therefore, we do not think that the mesocortical phenotype is an  
359 attenuated version of the mesoaccumbens one, although the lower density of the mesocortical  
360 projection (Fig. S2a) may explain the relative paucity of behavioural changes after chemogenetic  
361 mesocortical stimulation. Notably, the mesocortical pathway has been shown to be vital for certain  
362 forms of cost-benefit judgement, especially those involving uncertainty or sudden changes in task  
363 strategy<sup>25</sup>. As a result, manipulations of prefrontal DA affect tasks like probabilistic discounting or  
364 set shifting, but not reversal learning<sup>25,54</sup>.

365 Our data emphasize the importance of balanced DA signaling in the NAc. It is reasonable to  
366 assume that brain DA concentrations are tuned to levels that are optimal to survival, and deviations  
367 from this optimum lead to the profound behavioral impairments seen in certain mental disorders.  
368 We think that our proposed model of mesoaccumbens overactivation can explain the decision-  
369 making deficits that are seen during states of increased DAergic tone, such as manic episodes,  
370 substance abuse, and DA replacement therapy in Parkinson's disease. When one cannot devalue  
371 stimuli, actions or outcomes based on negative feedback, their value representation remains  
372 artificially elevated. Hence, outcome expectancies of choices will be unrealistically high, leading to  
373 behavior that is overconfident and overoptimistic. These inflated outcome expectancies have been  
374 demonstrated in human manic patients<sup>2</sup>, suggesting an inability to devalue goals towards realistic  
374 levels. That this disease state is associated with abolished negative RPE signaling in the NAc is  
376 substantiated by an fMRI study in patients experiencing acute mania<sup>55</sup>, in which activity in the NAc  
377 of manic patients remained high when monetary reward was omitted, while healthy controls  
378 showed a significant reduction in NAc activity, as expected based on RPE theory.

379 Most drugs of abuse enhance DA transmission in the brain, either in a direct (e.g. DA  
380 reuptake inhibition) or indirect way (e.g. disinhibition of DA neurons)<sup>56,57</sup>. Direct dopaminomimetics,  
381 such as cocaine and D-amphetamine, are known to mimic the symptoms of mania, such as  
382 increased arousal, euphoria, and a reduced decision-making capacity<sup>10</sup>. Impaired learning from  
383 negative feedback may potentially contribute to the escalation of drug use, since users may be  
384 insensitive to the thought of forthcoming negative consequences during the 'high' of these drugs.  
385 Furthermore, DA replacement therapy, often prescribed to Parkinson's disease patients, has been  
386 associated with the development of problem gambling, hypersexuality and excessive shopping  
387 behavior, a phenomenon known as the DA dysregulation syndrome<sup>58,59</sup>. More than a decade ago, it  
388 has already been hypothesized that these clinical features could be the result of impaired RPE  
389 learning due to 'overdosing' midbrain DA levels<sup>30,60</sup>. Here, we provide direct evidence to support  
390 this notion.

391

## 392 **Conclusion**

393 There is a wealth of evidence to implicate increased DA levels in harmful decision-making behavior  
394 in mental disorders<sup>1,2,3</sup>. Thus far, however, it was unknown through which pathways and by which  
395 mechanisms these effects were mediated. Here, we used behavioral tasks in rats, combined with  
396 projection-specific chemogenetics to show that hyperactivation of the VTA leads to decision-  
397 making deficits by impairing negative feedback learning through overstimulation of NAc DA  
398 receptors. Altogether, we provide a mechanistic understanding of why decision-making goes awry  
399 during states of hyperdopaminergic tone, providing an explanation for the reckless behaviors seen  
400 during drug use, mania, and DA replacement therapy in Parkinson's disease.



## **ACKNOWLEDGEMENTS**

Clozapine-N-oxide was a generous gift from the NIMH Chemical Synthesis and Drug Supply Program. We thank Roshan Cools for giving feedback on the manuscript, and the entire Adan and Vanderschuren labs for helpful discussions and feedback. This work was supported by the European Union Seventh Framework Programme under grant agreement number 607310 (*Nudge-IT*), and the Netherlands Organisation for Scientific Research (NWO) under project numbers 912.14.093 (*Shining light on loss of control*) and 863.13.018 (*NWO/ALW Veni grant*).

## **AUTHOR CONTRIBUTIONS**

J.P.H.V., J.W.D.J., G.v.d.P., R.A.H.A. and L.J.M.J.V. designed the experiments. J.P.H.V., J.W.D.J., T.J.M.R., C.F.M.H., R.v.Z., M.C.M.L., G.v.d.P. and R.H. performed the experiments. J.P.H.V. analyzed the behavioral and calcium imaging data. J.P.H.V. performed and H.E.M.d.O. supervised the computational analysis. I.W. and R.H. analyzed the microdialysis experiments. J.P.H.V., H.E.M.d.O., R.A.H.A. and L.J.M.J.V. wrote the paper with input from the other authors.

## **COMPETING FINANCIAL INTERESTS**

The authors declare no competing financial interests.

## References

- 1 Murphy, F. C. *et al.* Decision-making cognition in mania and depression. *Psychol. Med.* **31**, 679-693 (2001).
- 2 Johnson, S. L. Mania and dysregulation in goal pursuit: a review. *Clin. Psychol. Rev.* **25**, 241-262 (2005).
- 3 Rogers, R. D. *et al.* Dissociable deficits in the decision-making cognition of chronic amphetamine abusers, opiate abusers, patients with focal damage to prefrontal cortex, and tryptophan-depleted normal volunteers: evidence for monoaminergic mechanisms. *Neuropsychopharmacology* **20**, 322-339 (1999).
- 4 Grant, S., Contoreggi, C. & London, E. D. Drug abusers show impaired performance in a laboratory test of decision making. *Neuropsychologia* **38**, 1180-1187 (2000).
- 5 Noel, X., Brevers, D. & Bechara, A. A neurocognitive approach to understanding the neurobiology of addiction. *Curr. Opin. Neurobiol.* **23**, 632-638 (2013).
- 6 Fineberg, N. A. *et al.* New developments in human neurocognition: clinical, genetic, and brain imaging correlates of impulsivity and compulsivity. *CNS Spectr.* **19**, 69-89 (2014).
- 7 Frank, M. J., Seeberger, L. C. & O'Reilly R, C. By carrot or by stick: cognitive reinforcement learning in parkinsonism. *Science* **306**, 1940-1943 (2004).
- 8 Cools, R. Dopaminergic modulation of cognitive function-implications for L-DOPA treatment in Parkinson's disease. *Neurosci. Biobehav. Rev.* **30**, 1-23 (2006).
- 9 Volkow, N. D. & Morales, M. The brain on drugs: from reward to addiction. *Cell* **162**, 712-725 (2015).
- 10 van Enkhuizen, J. *et al.* The catecholaminergic-cholinergic balance hypothesis of bipolar disorder revisited. *Eur. J. Pharmacol.* **753**, 114-126 (2015).
- 11 Zeeb, F. D., Robbins, T. W. & Winstanley, C. A. Serotonergic and dopaminergic modulation of gambling behavior as assessed using a novel rat gambling task. *Neuropsychopharmacology* **34**, 2329-2343 (2009).
- 12 Linnet, J. *et al.* Striatal dopamine release codes uncertainty in pathological gambling. *Psychiatry Res.* **204**, 55-60 (2012).
- 13 Zalocusky, K. A. *et al.* Nucleus accumbens D2R cells signal prior outcomes and control risky decision-making. *Nature* **531**, 642-646 (2016).
- 14 Fields, H. L., Hjelmstad, G. O., Margolis, E. B. & Nicola, S. M. Ventral tegmental area neurons in learned appetitive behavior and positive reinforcement. *Annu. Rev. Neurosci.* **30**, 289-316 (2007).
- 15 Lammel, S., Lim, B. K. & Malenka, R. C. Reward and aversion in a heterogeneous midbrain dopamine system. *Neuropharmacology* **76**, 351-359 (2014).
- 16 Morales, M. & Margolis, E. B. Ventral tegmental area: cellular heterogeneity, connectivity and behaviour. *Nat. Rev. Neurosci.* **18**, 73-85 (2017).
- 17 Schultz, W., Dayan, P. & Montague, P. R. A Neural Substrate of Prediction and Reward. *Science* **275**, 1593-1601 (1997).
- 18 Steinberg, E. E. *et al.* A causal link between prediction errors, dopamine neurons and learning. *Nat. Neurosci.* **16**, 966-973 (2013).
- 19 Keiflin, R. & Janak, P. H. Dopamine prediction errors in reward learning and addiction: from theory to neural circuitry. *Neuron* **88**, 247-263 (2015).
- 20 Schultz, W. Dopamine reward prediction-error signalling: a two-component response. *Nat. Rev. Neurosci.* **17**, 183-195 (2016).
- 21 Cardinal, R. N., Parkinson, J. A., Hall, J. & Everitt, B. J. Emotion and motivation: the role of the amygdala, ventral striatum, and prefrontal cortex. *Neurosci. Biobehav. Rev.* **26**, 321-352 (2002).
- 22 Voorn, P., Vanderschuren, L. J.M.J., Groenewegen, H. J., Robbins, T. W. & Pennartz, C. M. A. Putting a spin on the dorsal-ventral divide of the striatum. *Trends Neurosci.* **27**, 468-474 (2004).
- 23 Floresco, S. B. The nucleus accumbens: an interface between cognition, emotion, and action. *Annu. Rev. Psychol.* **66**, 25-52 (2015).

- 24 Miller, E. K. & Cohen, J. D. An integrative theory of prefrontal cortex function. *Annu. Rev. Neurosci.* **24**, 167-202 (2001).
- 25 Floresco, S. B. Prefrontal dopamine and behavioral flexibility: shifting from an "inverted-U" toward a family of functions. *Front. Neurosci.* **7**, 62 (2013).
- 26 Collins, A. G. E. & Frank, M. J. Opponent actor learning (OpAL): Modeling interactive effects of striatal dopamine on reinforcement learning and choice incentive. *Psychol. Rev.* **121**, 337 (2014).
- 27 Rescorla, R. A. & Wagner, A. R. A theory of Pavlovian conditioning: Variations in the effectiveness of reinforcement and nonreinforcement. *Classical conditioning II: Current Research and Theory* **2**, 64-99 (1972).
- 28 Sutton, R. S. & Barto, A. G. Reinforcement learning: An introduction. (MIT press, 1998).
- 29 den Ouden, H. E. M. *et al.* Dissociable effects of dopamine and serotonin on reversal learning. *Neuron* **80**, 1090-1100 (2013).
- 30 Cools, R., Barker, R. A., Sahakian, B. J. & Robbins, T. W. Enhanced or impaired cognitive function in Parkinson's disease as a function of dopaminergic medication and task demands. *Cereb. Cortex* **11**, 1136-1143 (2001).
- 31 Boender, A. J. *et al.* Combined use of the canine adenovirus-2 and DREADD-technology to activate specific neural pathways in vivo. *PLoS One* **9** (2014).
- 32 Gunaydin, L. A. *et al.* Natural neural projection dynamics underlying social behavior. *Cell* **157**, 1535-1551 (2014).
- 33 St Onge, J. R., Stopper, C. M., Zahm, D. S. & Floresco, S. B. Separate prefrontal-subcortical circuits mediate different components of risk-based decision making. *The J. Neurosci.* **32**, 2886-2899 (2012).
- 34 Cardinal, R. N. & Howes, N. J. Effects of lesions of the nucleus accumbens core on choice between small certain rewards and large uncertain rewards in rats. *BMC Neurosci.* **6**, 37 (2005).
- 35 Tobler, P. N., Fiorillo, C. D. & Schultz, W. Adaptive coding of reward value by dopamine neurons. *Science* **307** (2005).
- 36 Yin, H. H., Ostlund, S. B. & Balleine, B. W. Reward-guided learning beyond dopamine in the nucleus accumbens: the integrative functions of cortico-basal ganglia networks. *Eur. J. Neurosci.* **28**, 1437-1448 (2008).
- 37 Zhang, M., Balmadrid, C. & Kelley, A. E. Nucleus accumbens opioid, GABAergic, and dopaminergic modulation of palatable food motivation: Contrasting effects revealed by a progressive ratio study in the rat. *Behav. Neurosci.* **117**, 202-211 (2003).
- 38 Salamone, J. D. & Correa, M. The mysterious motivational functions of mesolimbic dopamine. *Neuron* **76**, 470-485 (2012).
- 39 Hodos, W. Progressive ratio as a measure of reward strength. *Science* **134**, 943-944 (1961).
- 40 Beninger, R. J. The role of dopamine in locomotor activity and learning. *Brain Res. Rev.* **6**, 173-196 (1983).
- 41 Vanderschuren, L. J. M. J., Schoffelmeer, A. N. M., Wardeh, G. & De Vries, T. J. Dissociable effects of the kappa-opioid receptor agonists bremazocine, U69593, and U50488H on locomotor activity and long-term behavioral sensitization induced by amphetamine and cocaine. *Psychopharmacology* **150**, 35-44 (2000).
- 42 Van Bockstaele, E. J. & Pickel, V. M. GABA-containing neurons in the ventral tegmental area project to the nucleus accumbens in rat brain. *Brain Res.* **682**, 215-221 (1995).
- 43 Margolis, E. B. *et al.* Kappa opioids selectively control dopaminergic neurons projecting to the prefrontal cortex. *Proc. Natl. Acad. Sci. USA* **103**, 2938-2942 (2006).
- 44 van Zessen, R., Phillips, J. L., Budygin, E. A. & Stuber, G. D. Activation of VTA GABA neurons disrupts reward consumption. *Neuron* **73**, 1184-1194 (2012).
- 45 Brown, M. T. *et al.* Ventral tegmental area GABA projections pause accumbal cholinergic interneurons to enhance associative learning. *Nature* **492**, 452-456 (2012).

- 46 Qi, J. *et al.* VTA glutamatergic inputs to nucleus accumbens drive aversion by acting  
on GABAergic interneurons. *Nat. Neurosci.* **19**, 725-733 (2016).
- 47 Mehta, M. A., Swainson, R., Ogilvie, A. D., Sahakian, J. & Robbins, T. W. Improved  
short-term spatial memory but impaired reversal learning following the dopamine D2  
agonist bromocriptine in human volunteers. *Psychopharmacology* **159**, 10-20 (2001).
- 48 Boulougouris, V., Castane, A. & Robbins, T. W. Dopamine D2/D3 receptor agonist  
quinpirole impairs spatial reversal learning in rats: investigation of D3 receptor  
involvement in persistent behavior. *Psychopharmacology* **202**, 611-620 (2009).
- 49 Haluk, D. M. & Floresco, S. B. Ventral striatal dopamine modulation of different forms  
of behavioral flexibility. *Neuropsychopharmacology* **34**, 2041-2052 (2009).
- 50 Stopper, C. M., Khayambashi, S. & Floresco, S. B. Receptor-specific modulation of  
risk-based decision making by nucleus accumbens dopamine.  
*Neuropsychopharmacology* **38**, 715-728 (2013).
- 51 Mitchell, M. R., Vokes, C. M., Blankenship, A. L., Simon, N. W. & Setlow, B. Effects of  
acute administration of nicotine, amphetamine, diazepam, morphine, and ethanol on  
risky decision-making in rats. *Psychopharmacology* **218**, 703-712 (2011).
- 52 Simon, N. W. *et al.* Dopaminergic modulation of risky decision-making. *J. Neurosci.*  
**31**, 17460-17470 (2011)
- 53 St Onge, J. R., Abhari, H. & Floresco, S. B. Dissociable contributions by prefrontal D1  
and D2 receptors to risk-based decision making. *J. Neurosci.* **31**, 8625-8633 (2011).
- 54 Crofts, H. S. *et al.* Differential effects of 6-OHDA lesions of the frontal cortex and  
caudate nucleus on the ability to acquire an attentional set. *Cereb. Cortex* **11**,  
1015-1026 (2001).
- 55 Abler, B., Greenhouse, I., Ongur, D., Walter, H. & Heckers, S. Abnormal reward  
system activation in mania. *Neuropsychopharmacology* **33**, 2217-2227 (2008).
- 56 Di Chiara, G. & Imperato, A. Drugs abused by humans preferentially increase  
synaptic dopamine concentrations in the mesolimbic system of freely moving rats.  
*Proc. Natl. Acad. Sci. USA* **85**, 5274-5278 (1988).
- 57 Lüscher, C. & Ungless, M. A. The mechanistic classification of addictive drugs. *PLoS  
Med.* **3**, e437 (2006).
- 58 Evans, A. H. & Lees, A. J. Dopamine dysregulation syndrome in Parkinson's disease.  
*Curr. Opin. Neurol.* **17**, 393-398 (2004).
- 59 Berk, M. *et al.* Dopamine dysregulation syndrome: implications for a dopamine  
hypothesis of bipolar disorder. *Acta Psychiatr. Scand.* **116**, 41-49 (2007).
- 60 Frank, M. J. Dynamic dopamine modulation in the basal ganglia: a  
neurocomputational account of cognitive deficits in medicated and nonmedicated  
Parkinsonism. *J. Cogn. Neurosci.* **17**, 51-72 (2005).

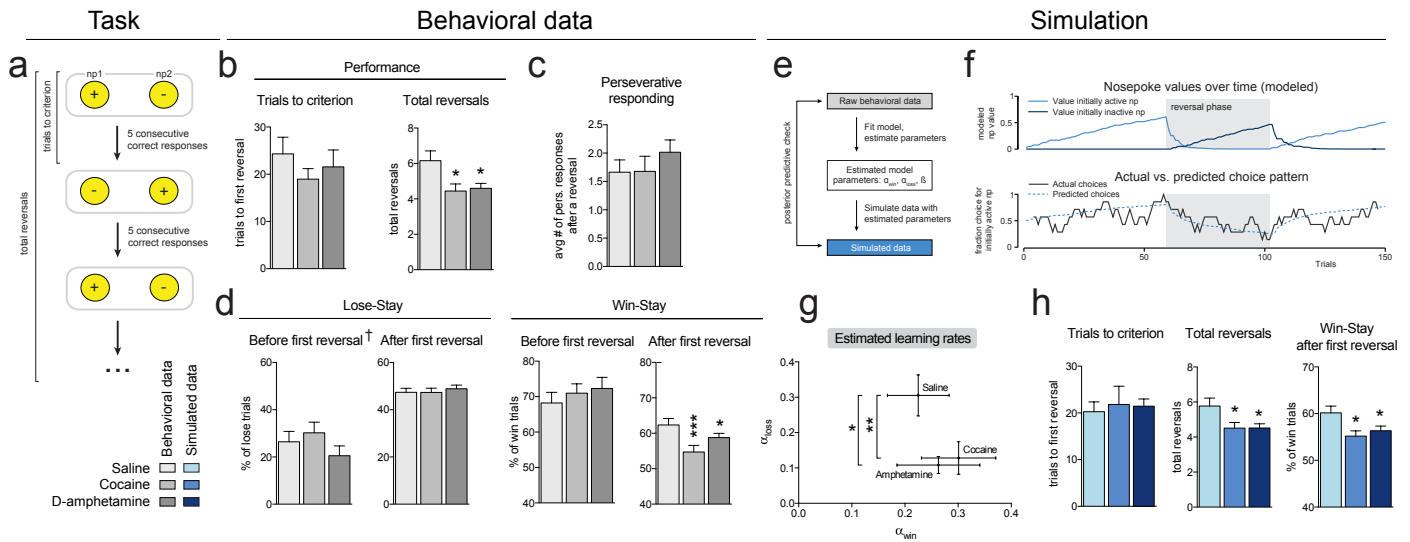

**Figure 1** Treatment with cocaine or D-amphetamine impairs reversal learning. **(a)** Task design. **(b)** Systemic treatment with cocaine (10 mg/kg) or D-amphetamine (0.25 mg/kg) did not alter the number of trials required to reach the first reversal (one-way repeated measures ANOVA,  $p = 0.55$ ). However, cocaine- or D-amphetamine treatment decreased the total number of reversals accomplished (one-way repeated measures ANOVA,  $p = 0.0037$ ; post-hoc Sidak's multiple comparisons test,  $p = 0.0102$  cocaine versus saline,  $p = 0.0197$  D-amphetamine versus saline). **(c)** Treatment with cocaine or D-amphetamine did not alter perseverative behavior after a reversal ( $p = 0.46$ ). **(d)** Lose-stay behavior was unaffected after both cocaine or D-amphetamine treatment, both before ( $p = 0.21$  †) and after ( $p = 0.77$ ) the first reversal. Cocaine and D-amphetamine decreased win-stay behavior after (ANOVA,  $p = 0.0007$ ; post-hoc Sidak's multiple comparisons test,  $p = 0.0009$  for cocaine versus saline,  $p = 0.0336$ , D-amphetamine versus saline), but not before the first reversal ( $p = 0.67$ ). Data in (b),(c),(d) and (g): repeated measures from  $n = 25$  animals. † 6 animals had no losses before the first reversal (i.e., trials to first criterion was 5), so the repeated measures ANOVA was performed on data of  $n = 19$  animals; graph shows  $n = 25$ . **(e)** We used a modified Rescorla-Wagner model to describe the behavior of the rats during reversal learning. **(f)** Simulated data from an example session. (upper panel) Simulated values of the nose pokes, given the rat's optimal model parameters and observed choice sequence. (lower panel) Modeled choice probabilities, converted from the simulated nosepoke values using a softmax (unsmoothed), and the rat's actual choice pattern (smoothed over 7 trials). **(g)** Best-fit learning parameters. Treatment with cocaine and D-amphetamine significantly decreased  $\alpha_{loss}$ , without affecting the other model coefficients. (Wilcoxon matched pairs signed rank test, \*  $p = 0.032$ , \*\*  $p = 0.0046$ , see also Table S2) **(h)** Simulating data with the model parameters extracted in (g) replicated the drug-induced effects of the behavioral data shown in (b) and (d). ( $n = 25$  simulated rats; ANOVA on trials to criterion,  $p = 0.86$ ; ANOVA on total reversals,  $p = 0.0114$ , post-hoc Sidak's test,  $p = 0.0411$  for cocaine and  $p = 0.0215$  for D-amphetamine; ANOVA on win-stay behavior,  $p = 0.0090$ , post-hoc Sidak's test,  $p = 0.0181$  for cocaine and  $p = 0.0462$  for D-amphetamine. ANOVA on all other outcomes measures, all  $p > 0.1$ ). Data are shown as mean  $\pm$  standard error of the mean.



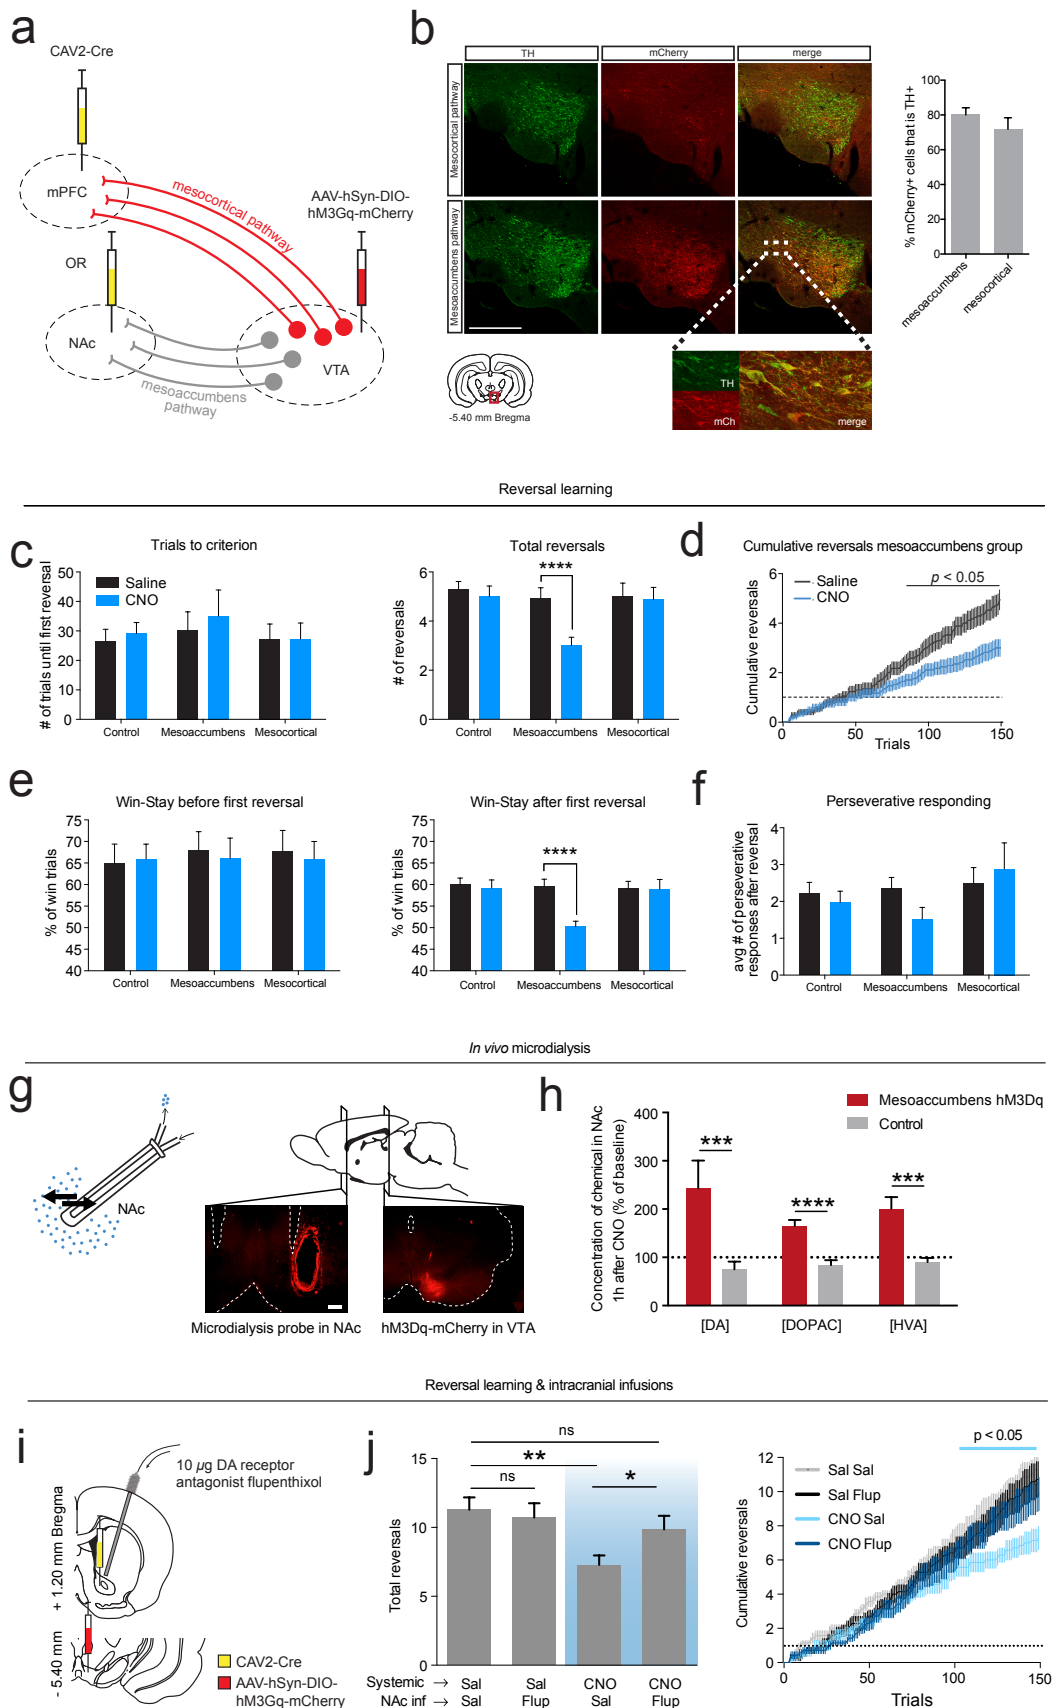

**Figure 2** Chemogenetic activation of the mesoaccumbens, but not mesocortical pathway mimicked the effects of cocaine and D-amphetamine on reversal learning. **(a)** Experimental design. Animals received an infusion of CAV2-Cre into either the mPFC or NAc. A Cre-dependent Gq-DREADD virus was injected bilaterally into the VTA. **(b)** (left panel) Representative histology images showing coronal sections stained for tyrosine hydroxylase (left), DREADD-mCherry (middle) and an overlay (right). Image bottom left corner from Paxinos and Watson (2007). Scalebar, 500  $\mu$ m. (right panel) Co-staining of mCherry with tyrosine hydroxylase, showing the percentage of DREADD-transfected neurons that is dopaminergic (mean  $\pm$  s.d.). Data from n = 9 (mesoaccumbens),

n = 8 (mesocortical) animals. (c) (left panel) Activation of either pathway did not affect the number of trials needed to reach the first reversal (i.e., 5 consecutive correct responses; two-way repeated measures ANOVA; main effect of CNO,  $p = 0.54$ ; group  $\times$  CNO interaction,  $p = 0.90$ ). (right panel) Performance on the task over the entire session was significantly impaired after mesoaccumbens activation (two-way repeated measures ANOVA; main effect of CNO,  $p = 0.0025$ ; group  $\times$  CNO interaction,  $p = 0.0067$ ; post-hoc Sidak's multiple comparisons test,  $p = 0.89$  for control group,  $p < 0.0001$  for mesoaccumbens group,  $p = 0.99$  for mesocortical group) (d) Plot of the cumulative reversals over time shows that the performance deficit after mesoaccumbens activation does not appear until after the first reversal (Sidak's multiple comparisons test corrected for 150 comparisons,  $p < 0.05$  after trial 85). Dashed line indicates first reversal. (e) A significant decrease in win-stay behavior after (two-way repeated measures ANOVA; main effect of CNO,  $p = 0.0040$ ; group  $\times$  CNO interaction,  $p = 0.0026$ ; post-hoc Sidak's multiple comparisons test,  $p = 0.9647$  for control group,  $p < 0.0001$  for mesoaccumbens group,  $p = 0.9997$  for mesocortical group), but not before first reversal (two-way repeated measures ANOVA; main effect of CNO,  $p = 0.78$ ; group  $\times$  CNO interaction,  $p = 0.91$ ) was observed during mesoaccumbens activation. (f) Perseverative behavior was not affected (two-way repeated measures ANOVA; main effect of CNO,  $p = 0.89$ ; group  $\times$  CNO interaction,  $p = 0.71$ ). All data: n = 17 control, n = 17 mesoaccumbens, n = 16 mesocortical group. (g) Microdialysis was used to measure extracellular concentrations of DA and its metabolites in the NAc after chemo-genetic mesoaccumbens stimulation. Scalebar, 500  $\mu\text{m}$ . (h) NAc levels of DA and its metabolites were elevated one hour after an i.p. CNO injection in DREADD-infected animals compared to controls (post-hoc tests, DA,  $p = 0.0002$ ; DOPAC,  $p < 0.0001$ ; HVA,  $p = 0.0008$ ; see also Fig. S4). (i) Prior to reversal learning, animals received systemic CNO (or saline) for DREADD stimulation and a microinjection with  $\alpha$ -flupenthixol (or saline) into the nucleus accumbens. (j)  $\alpha$ -flupenthixol itself had no effect on reversal learning, but prevented the CNO-induced impairment on reversal learning (ANOVA,  $p = 0.0024$ ; post-hoc Holm-Sidak's test: \*\* $p = 0.0019$ , \* $p = 0.0397$ ). Note that animals had a higher baseline of reversals in this experiment, because the animals were trained on the task (see Online methods). Abbreviations: Sal, saline; Flup,  $\alpha$ -flupenthixol; ns, not significant.



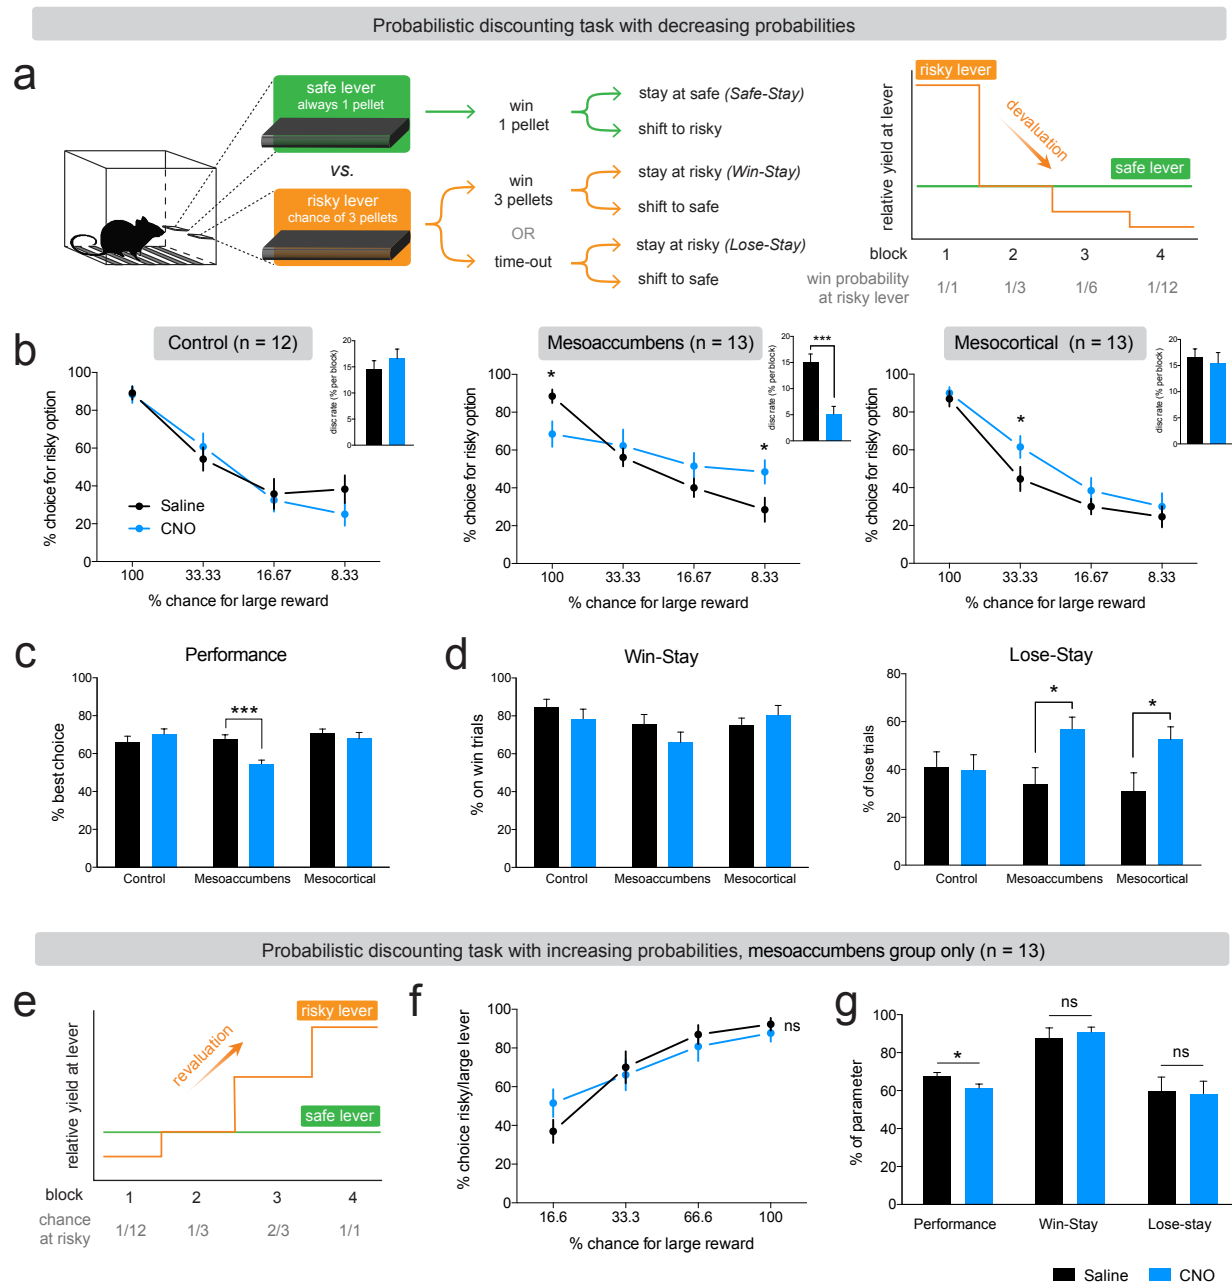

**Figure 4** Chemogenetic activation of the mesoaccumbens and the mesocortical pathway alters probabilistic discounting. **(a)** Task design. **(b)** Discounting curves for individual groups. (left panel) Sham control group (saline vs CNO; Sidak's test,  $p > 0.1$  for all blocks). (middle panel) During mesoaccumbal hyperactivity, animals have a smaller preference for the risky lever in the first block (Sidak's test,  $p = 0.0468$ ), a larger preference for the risky lever in the last block ( $p = 0.0468$ ; block 2 and 3 both  $p > 0.1$ ), and a significantly diminished discounting rate (inset,  $p = 0.0002$ ). (right panel). Mesocortical activation increased choice for the risky lever in the second block (Sidak's test in block 2,  $p = 0.0247$ ; block 1, 3 and 4, all  $p > 0.1$ ). Asterisks in discounting curves indicate significant difference between saline and CNO treatment. Insets display the average steepness of the discounting curve (statistical comparison with Sidak's test). **(c)** Mesoaccumbens activation reduces the percentage optimal choices in the probabilistic discounting task (i.e., % best choice in blocks 1, 3 and 4; two-way repeated measures ANOVA; main effect of CNO,  $p = 0.0331$ ; group  $\times$  CNO interaction effect,  $p = 0.0016$ ; post-hoc Sidak's test,  $p = 0.5082$  for control group,  $p = 0.0004$  for mesoaccumbens group,  $p = 0.7533$  for mesocortical group). **(d)** Chemogenetic activation of the mesoaccumbens or mesocortical pathway had no effect on win-stay behavior (two-way repeated measures ANOVA; main effect of CNO,  $p = 0.36$ ; group  $\times$  CNO interaction effect,  $p = 0.26$ ), but did increase lose-stay behavior (two-way repeated measures ANOVA; main effect of CNO,  $p = 0.0026$ ; group  $\times$  CNO interaction effect,  $p = 0.0622$ ; post-hoc Sidak's test,  $p = 0.9988$ ,  $p = 0.0177$  and  $p = 0.0203$  for control, mesoaccumbens and mesocortical groups, respectively). **(e)** Task design of the probabilistic discounting task with increasing probabilities. **(f)** Mesoaccumbens activation did not affect the discounting curve (Sidak's test in every block,  $p > 0.1$ ). **(g)** Mesoaccumbens activation decreased performance on the task (paired t-test,  $p = 0.0143$ ), but not win-stay (paired t-test,  $p = 0.32$ ) or lose-stay behavior (paired t-test,  $p = 0.85$ ). Data are shown as mean  $\pm$  standard error of the mean.

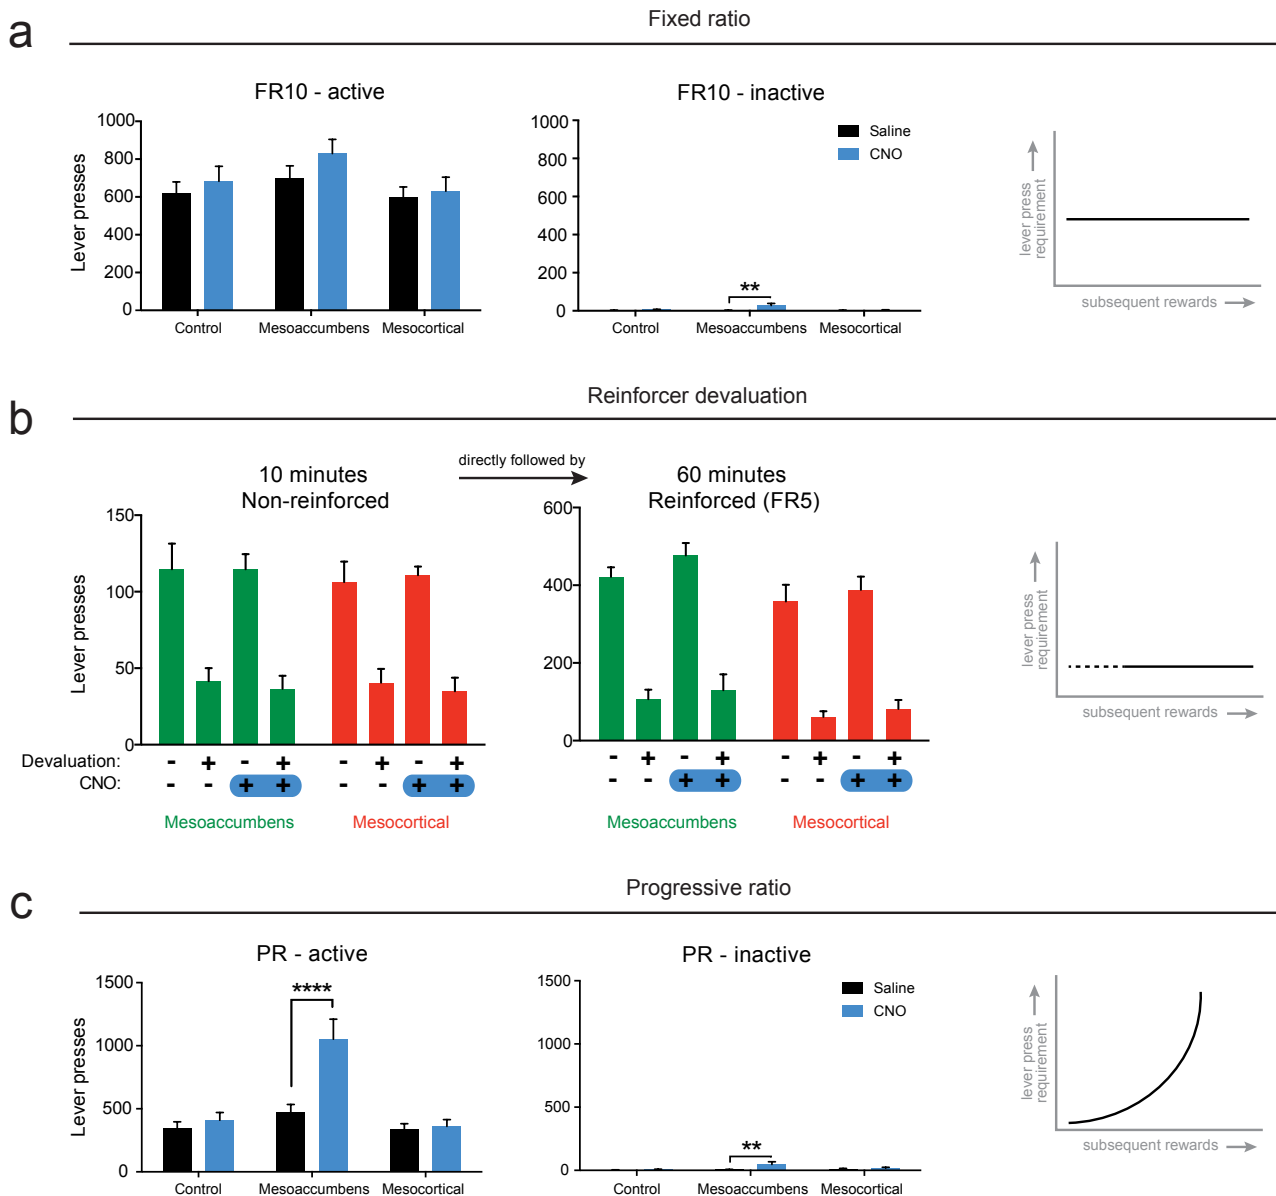

**Figure 5** Mesocortical and mesoaccumbens activation does not alter the static reward value of sucrose. **(a)** DREADD activation of either pathway did not affect the number of active lever presses for sucrose under a fixed-ratio 10 schedule of reinforcement (two-way repeated measures ANOVA; main effect of CNO,  $p = 0.0355$ ; group  $\times$  CNO interaction,  $p = 0.5001$ ; post-hoc Sidak's multiple comparisons test, CNO versus saline, all  $p > 0.1$ ). A significant but numerically modest increase was observed in inactive lever presses after mesoaccumbens activation (two-way repeated measures ANOVA; main effect of CNO,  $p = 0.0096$ ; group  $\times$  CNO interaction,  $p = 0.0207$ ; post-hoc Sidak's multiple comparisons test, CNO versus saline,  $p = 0.9302$  for controls,  $p = 0.0017$  for mesoaccumbens group;  $p = 0.9957$  for mesocortical group).  $n = 9$  for control,  $n = 8$  for mesoaccumbens group,  $n = 9$  for mesocortical group. **(b)** Both during a 10-minute extinction session (left panel) and a reinforced lever pressing session (under an FR5 schedule of reinforcement, right panel), devaluation of the reinforcer by selective satiation for sucrose lead to a decrease in responding (2-way repeated measures ANOVA, main effect of prefeeding in all four groups,  $p < 0.0001$ ), without any effects of CNO (non-reinforced mesoaccumbens, CNO effect  $p = 0.7745$ , prefeeding  $\times$  CNO interaction:  $p = 0.8448$ ; non-reinforced, mesocortical, CNO effect  $p = 0.9516$ , prefeeding  $\times$  CNO interaction:  $p = 0.5318$ ; reinforced mesoaccumbens, CNO effect  $p = 0.1472$ , prefeeding  $\times$  CNO interaction:  $p = 0.5287$ ; reinforced mesocortical, CNO effect  $p = 0.4654$ , prefeeding  $\times$  CNO interaction:  $p = 0.8877$ ).  $n = 12$  for mesoaccumbens,  $n = 11$  for mesocortical group. **(c)** Under a progressive ratio schedule of reinforcement, mesoaccumbens activation significantly increased the number of lever presses made (two-way repeated measures ANOVA; main effect of CNO,  $p = 0.0006$ ; group  $\times$  CNO interaction,  $p = 0.0007$ ; post-hoc Sidak's multiple comparisons test,  $p = 0.8998$  for controls;  $p = 0.8998$  for control group;  $p < 0.0001$  for mesoaccumbens group;  $p = 0.9947$  for mesocortical group). A significant but numerically modest increase in cumulative inactive lever presses was observed after mesoaccumbens stimulation (two-way repeated measures ANOVA; main effect of CNO,  $p = 0.0204$ ; group  $\times$  CNO interaction effect,  $p = 0.0680$ ; post-hoc Sidak's multiple comparisons test, CNO versus saline,  $p = 0.9840$  for controls;  $p = 0.0082$  for mesoaccumbens group;  $p = 0.9392$  for mesocortical group).  $n = 9$  for control,  $n = 8$  for mesoaccumbens group,  $n = 9$  for mesocortical group. Data are shown as mean  $\pm$  standard error of the mean.



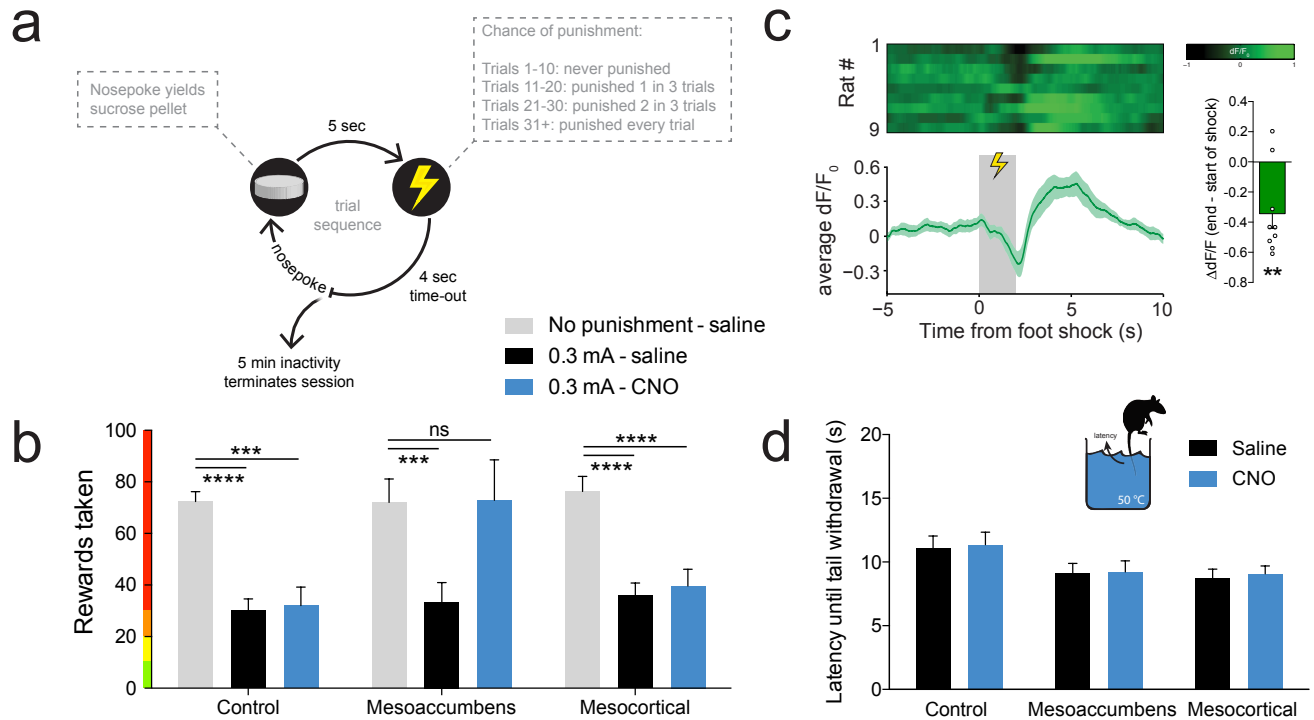

**Figure 6** Mesoaccumbens, but not mesocortical activation attenuates the effect of punishment on responding for sucrose. **(a)** Task design. **(b)** After saline treatment, footshock punishment robustly diminished responding (Sidak's multiple comparisons test, '0.3 mA saline' versus 'no punishment saline', all  $p < 0.001$ ). This effect was abolished by activation of the mesoaccumbens, but not the mesocortical, pathway (Sidak's test, '0.3 mA CNO' versus 'no punishment saline' in the mesoaccumbens group,  $p = 0.9995$ ; in mesocortical group,  $p = 0.0002$ ; in control group,  $p < 0.0001$ ).  $n = 9$  control,  $n = 9$  mesoaccumbens group,  $n = 10$  mesocortical group. **(c)** Footshock punishment evoked a decrease in DA neuron activity, measured using fiber photometry in TH::Cre rats (one-sample t-test,  $p = 0.0074$ ,  $n = 9$  rats). **(d)** No modulation of nociception by mesoaccumbens or mesocortical activation in the tail withdrawal test (2-way repeated measures ANOVA; main effect of CNO,  $p = 0.75$ ; group  $\times$  CNO interaction,  $p = 0.99$ ).  $n = 8$  control,  $n = 9$  mesoaccumbens group,  $n = 9$  mesocortical group. Data are shown as mean  $\pm$  standard error of the mean. \*\*\*\*  $p < 0.0001$ , \*\*\*  $p < 0.001$

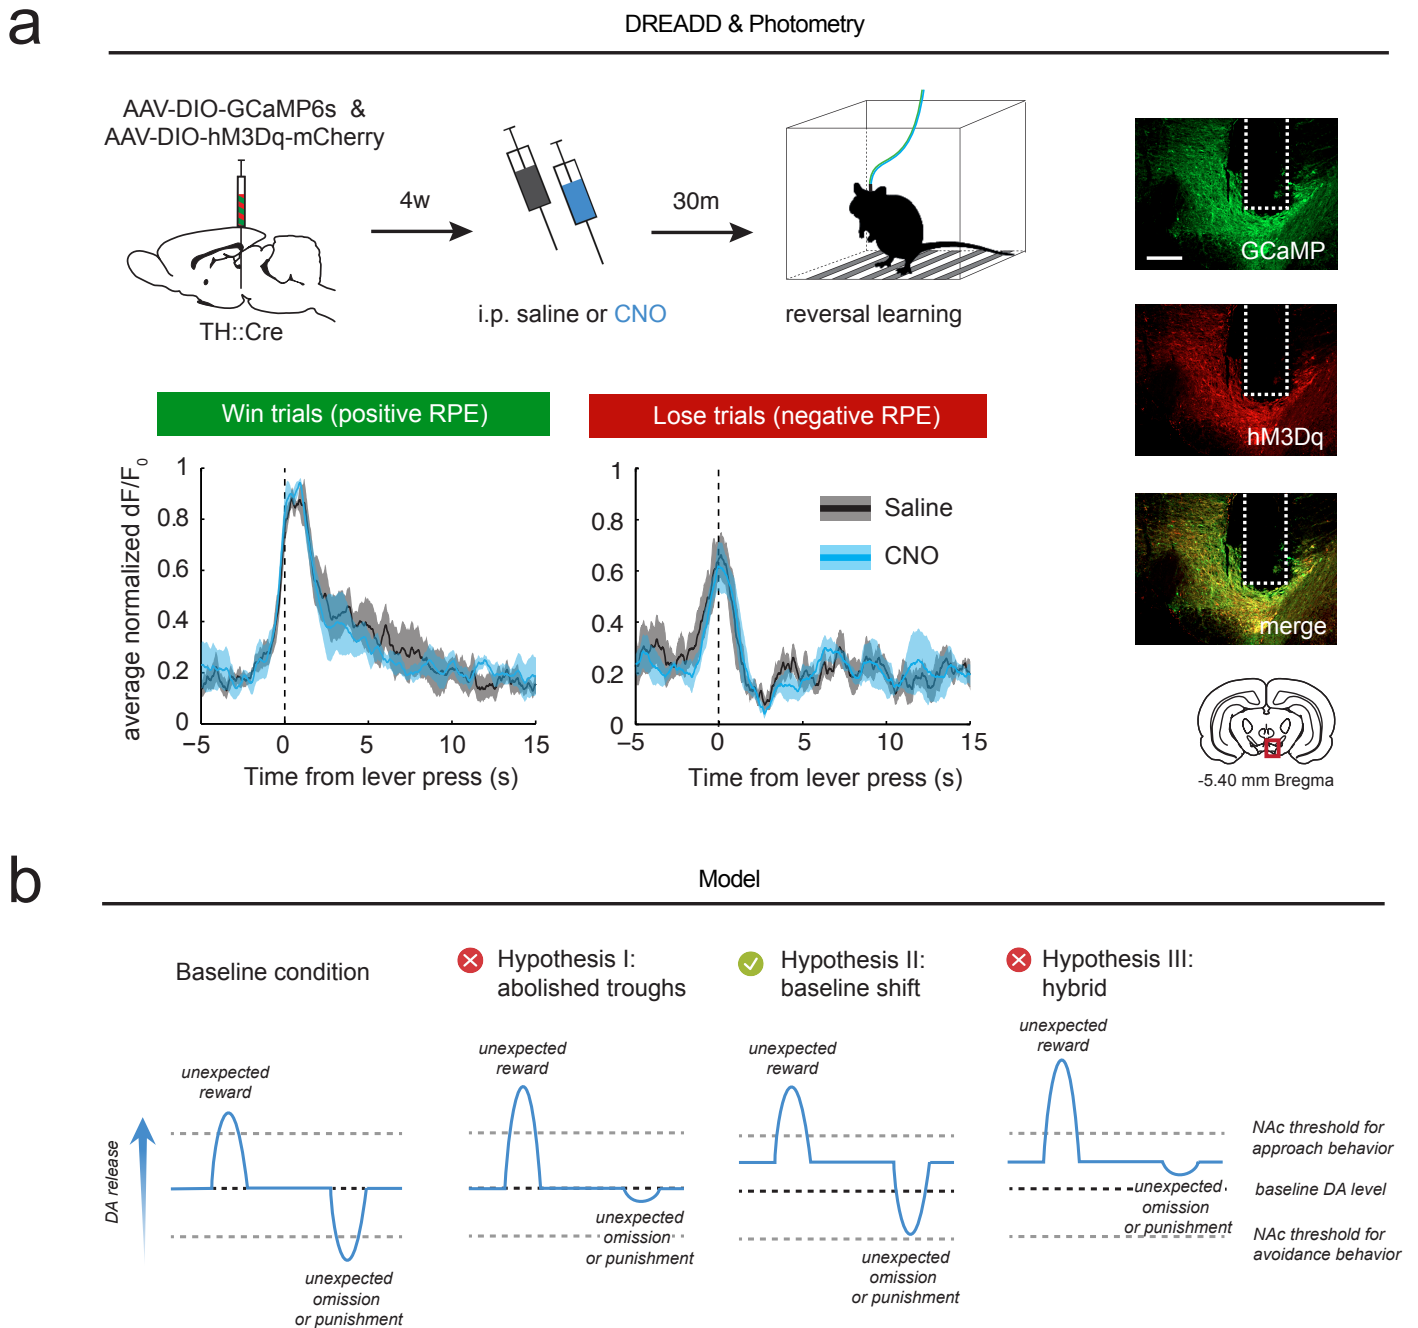

**Figure 7** RPE processing after mesoaccumbens stimulation. (a) Animals were co-injected with GCaMP6s and Gq-DREADD and tested for reversal learning after injection of saline or CNO. VTA neurons responded in a comparable way during reversal learning after saline and CNO treatment (repeated measures in  $n = 4$  animals; ANOVA, CNO  $\times$  time interaction effect, win trials,  $p = 0.39$ ; lose trials,  $p = 0.38$ ). See figure S9a for individual animals. Scale bar, 1mm. Data are shown as mean (solid line)  $\pm$  standard error of the mean (shading). (b) Proposed mechanisms: (I) Hyperactivity of NAc-projecting VTA DA neurons leads to impaired coding of negative RPE troughs, (II) Hyperactivity shifts baseline NAc DA levels, thereby preventing the exceedance of a negative RPE threshold in the NAc and impairing the ability to learn from negative feedback, or (III) A combination of both.
